# Supplementary material for: A Sensitive and Rapid Method for Detecting Formaldehyde in Brain Tissues
Source: Hindawi journal article supplement (doi:10.1155/2017/9043134), 2017-01-01
Supplement: f1 [file 9043134.f1.pdf]

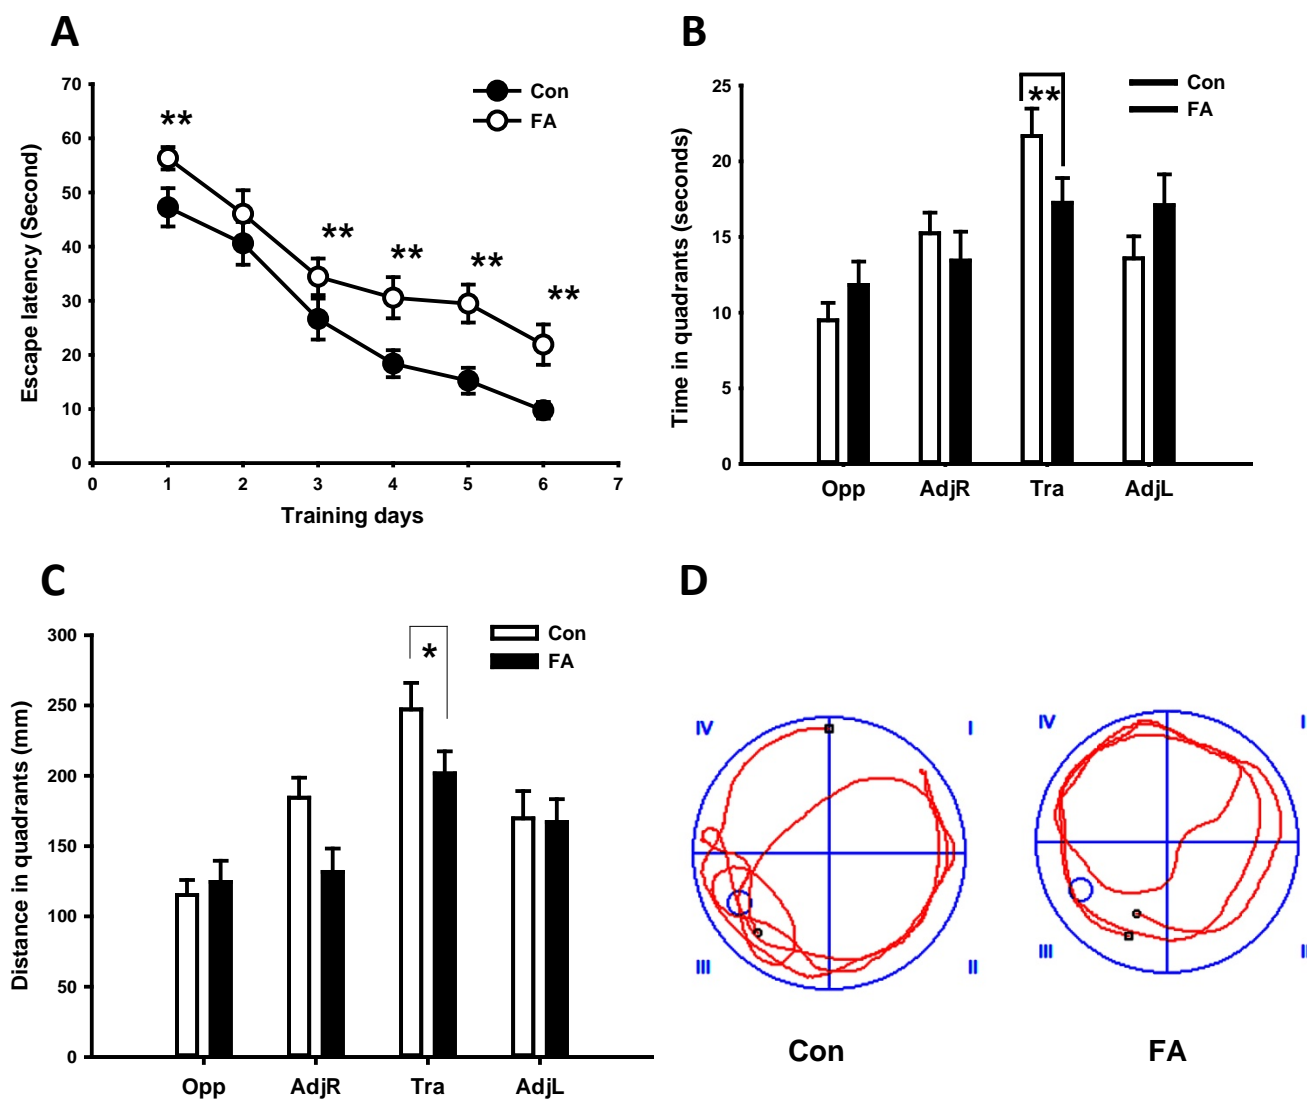

**Supplementary Fig. 1.** Changes in the escape latency of FA-injected mice and control mice (**A**), the time in target quadrant (**B**), swimming distance in the target quadrant (**C**), and swimming traces in the target quadrant (**D**).

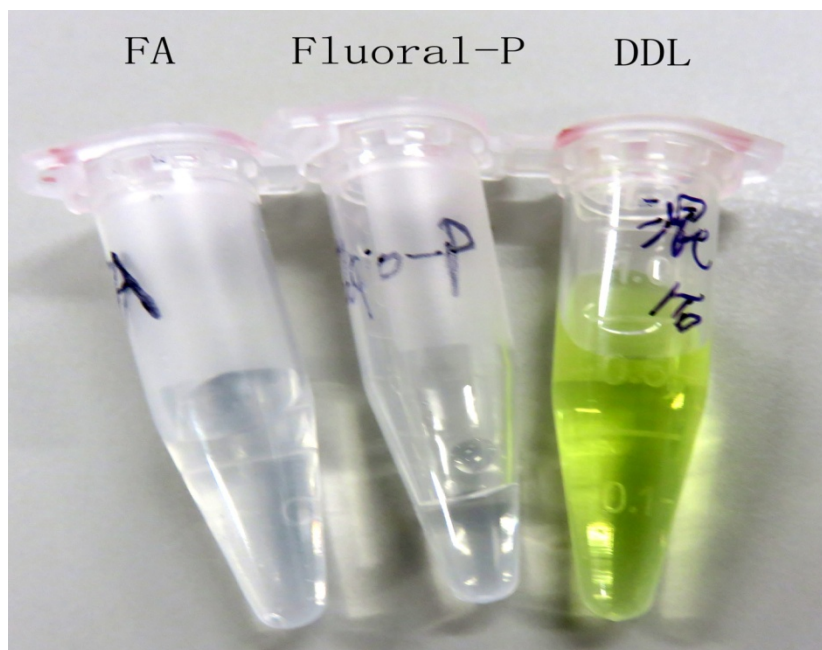

**Supplementary Fig. 2.** A yellow compound: 3,5-diacetyl-1,4-dihydrolutidine (DDL) is immediately generated after the derivative reaction occurs between the colorless reagent- formaldehyde (FA) and 4-amino-3-pentene-2-one (Fluoral-P ) at pH 6.0.

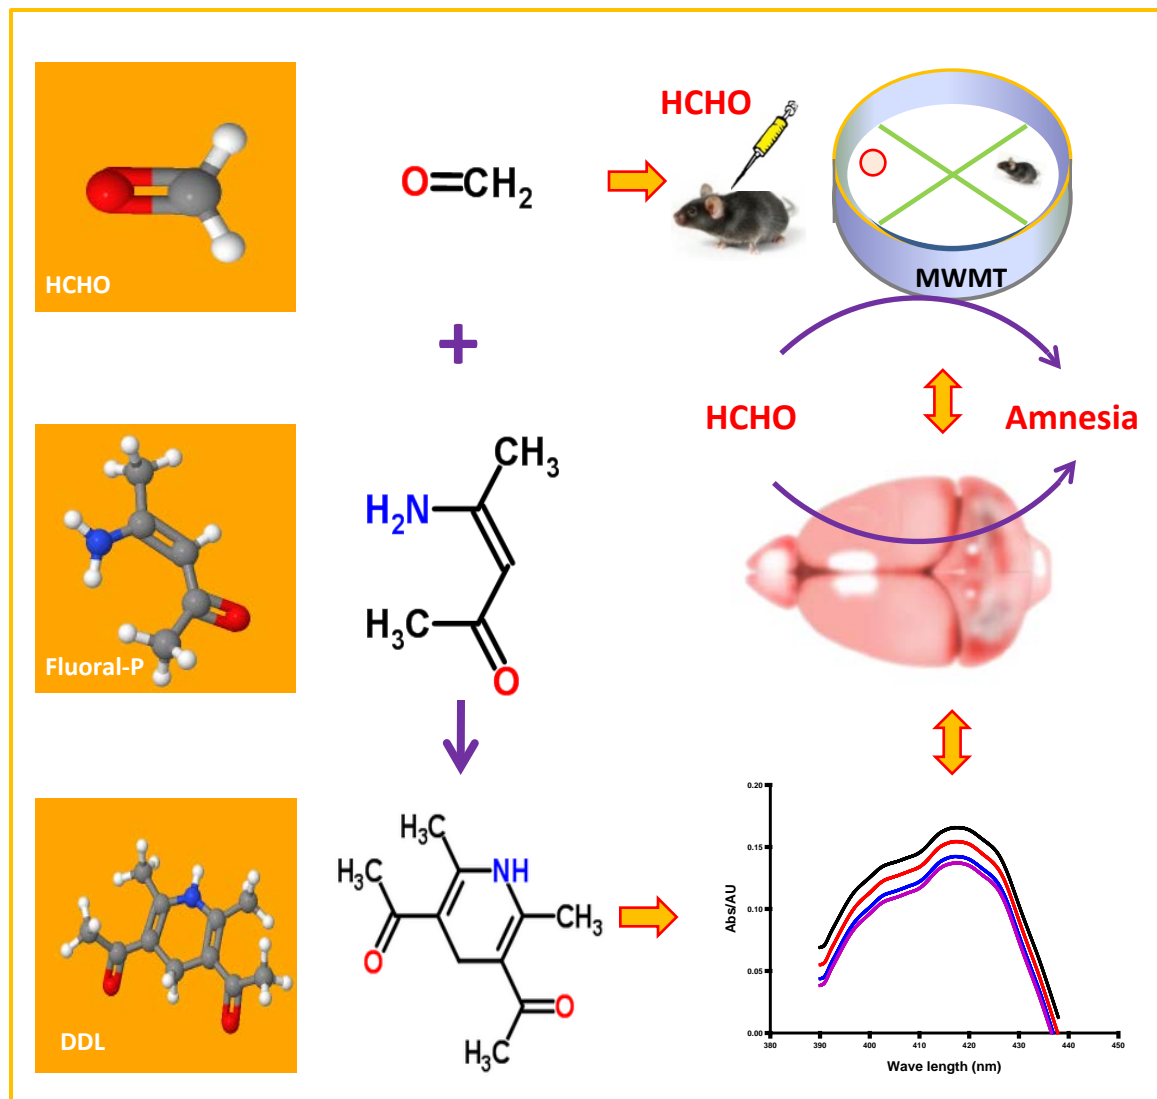

**Supplementary Fig. 3.** The spectrophotometric method is based on a reaction in which formaldehyde (FA, HCHO) reacts with 4-amino-3-pentene-2-one (Fluoral-P) to produce a yellow compound: 3,5-diacetyl-1,4-dihydrolutidine (DDL), and DDL can be detected by spectrophotometer at 420 nm. Using this method, an abnormal high level of FA is detected in the brain of FA-injected mice associated with spatial memory deficits (amnesia).

# Supplementary Table 1

**Table S1: Characteristics of autopsy samples from postmortem human hippocampus**

|                         | Alzheimer's disease Patients<br>(n=9) | Age-matched controls<br>(n=8) |
|-------------------------|---------------------------------------|-------------------------------|
| Age (Years)             | 85.14 ± 5.62                          | 83.60 ± 7.13                  |
| ApoE genotypes          | ε 4/ ε 4                              | ε 3/ ε 3                      |
| Postmortem interval (h) | 8.11 ± 5.62                           | 8.25 ± 4.85                   |
| Brain pH                | 6.56 ± 0.06                           | 6.52 ± 0.07                   |
| Amyloid                 | +++                                   | ----                          |

\*\* The age (years), postmortem interval (hours), and brain pH from autopsy hippocampal samples did not differ significantly between the respective groups. h: hour.
